# Supplementary material for: Breaking the Biofilm Barrier: An in-silico therapeutic approach against Vibrio cholerae using metabolites of Erigeron breviscapus
Source: Research Square preprint supplement (doi:10.21203/rs.3.rs-6767051/v1), 2025-10-16
Supplement: Supplementary file 1 [file f1b32243cfa09ba02bc77167.docx]

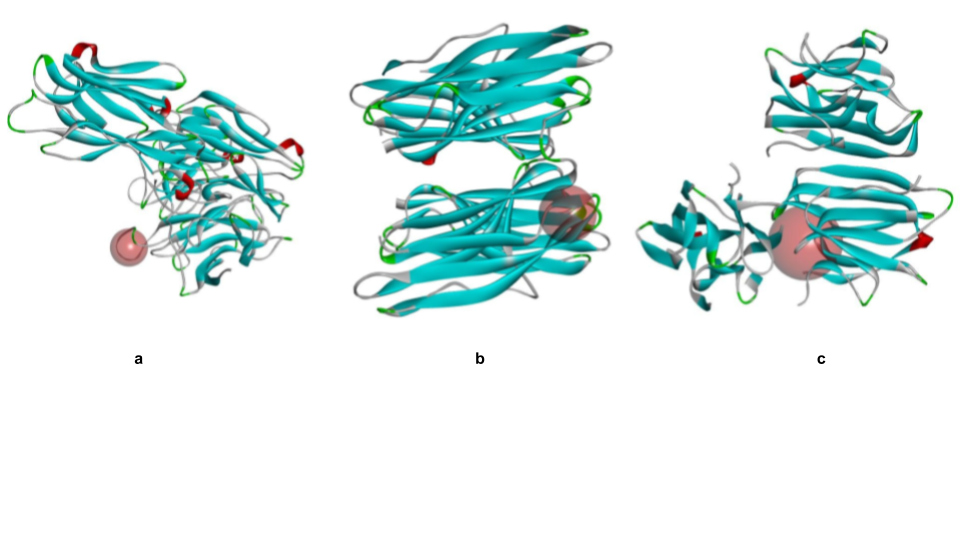


**Online Resource 1** Active site of the receptors depicted as red spheres: (a) Bap1, (b) RbmA, (c) RbmC

**Online Resource 2** Docking scores of the ligands with the receptors

| **LIGANDS** | **COMPOUND CID** | **BINDING AFFINITY (kcal/mol)** | | |
| --- | --- | --- | --- | --- |
| **Bap1** | **RbmA** | **RbmC** |
| Resveratrol (control) | 445154 | -7.1 | -7.6 | -7.4 |
| 1-Caffeoylquinic acid | 10155076 | -7.1 | -8.1 | -8.3 |
| 4-O-Caffeoylquinic acid | 9798666 | -6.9 | -8.0 | -8.5 |
| 1,3-Di-O-caffeoylquinic acid | 6474640 | -6.6 | -9.3 | -9.1 |
| 3,4-Di-O-caffeoylquinic acid | 5281780 | -7.9 | -9.8 | -10.4 |
| 3,5-Di-O-caffeoylquinic acid | 6474310 | -7.2 | -9.1 | -9.0 |
| 4,5-Di-O-caffeoylquinic acid | 6474309 | -7.8 | -9.8 | -10.4 |
| 3,5,6,4'-Tetrahydroxy-7-methoxyflavone | 14258996 | -7.5 | -8.5 | -8.1 |
| 3-O-caffeoyl-gamma-quinide | 102210472 | -7.6 | -8.4 | -8.2 |
| 5,7-Dihydroxychromone | 5281343 | -5.5 | -6.0 | -6.4 |
| Apigenin | 5280443 | -7.6 | -8.3 | -8.2 |
| Betulabuside A | 14484636 | -6.6 | -6.3 | -7.0 |
| Caffeic acid | 689043 | -5.4 | -6.2 | -6.7 |
| Chlorogenic acid | 1794427 | -7.0 | -8.5 | -8.8 |
| Erigeroside | 162876 | -5.8 | -7.0 | -6.9 |
| Erigeside A | 101666177 | -7.3 | -7.2 | -8.0 |
| Erigeside B | 5318046 | -5.3 | -5.5 | -6.3 |
| Erigeside C | 14132346 | -6.3 | -7.1 | -7.8 |
| Eriodictyol | 440735 | -7.5 | -8.7 | -8.2 |
| Scopoletin | 5280460 | -5.6 | -6.4 | -6.6 |
| Isoscopoletin | 69894 | -5.7 | -6.3 | -7.1 |
| Kaempferol-3-O-glucoside | 5282102 | -7.1 | -9.9 | -8.5 |
| Kaempferol-3-O-rutinoside | 5318767 | -7.6 | -9.5 | -10.1 |
| Luteolin | 5280445 | -7.5 | -8.6 | -8.6 |
| Methyl caffeate | 689075 | -5.3 | -5.8 | -6.2 |
| Naringenin | 932 | -7.6 | -8.4 | -8.0 |
| Naringenin-7-O-glucuronide | 51136360 | -8.2 | -9.9 | -9.8 |
| Pyromeconic acid | 68129 | -3.9 | -4.0 | -4.9 |
| Quercetin-3-O-beta-D-glucoside | 25203368 | -7.5 | -9.8 | -9.0 |
| Quercetin-3-O-glucuronide | 5274585 | -7.6 | -9.7 | -9.2 |
| Scutellarin | 185617 | -8.1 | -9.8 | -9.9 |

**Online Resource 3** AdditionalADME properties of resveratrol and the selected ligands

| **PROPERTY** | **PARAMETERS** | **LIGANDS** | | | |
| --- | --- | --- | --- | --- | --- |
| **Resveratrol** | **Apigenin** | **Eriodictyol** | **Naringenin** |
| **Physicochemical** | **Formula** | C14H12O3 | C15H10O5 | C15H12O6 | C15H12O5 |
| **Molecular weight (g/mol)** | 228.24 | 270.24 | 288.25 | 272.25 |
| **Fraction Csp3** | 0.00 | 0.00 | 0.13 | 0.13 |
| **Num. rotatable bonds** | 2 | 1 | 1 | 1 |
| **Lipophilicity** | **XLOGP3** | 3.13 | 3.02 | 2.02 | 2.52 |
| **Pharmacokinetics** | **Log *K*p (skin permeability; cm/s)** | -5.47 | -5.80 | -6.62 | -6.17 |
| **CYP1A2 inhibitor** | Yes | Yes | No | Yes |
| **CYP2C19 inhibitor** | Yes | Yes | No | No |
| **CYP2C9 inhibitor** | No | No | No | No |
| **CYP2D6 inhibitor** | No | No | No | No |
| **CYP3A4 inhibitor** | No | No | No | No |
| **Druglikeness** | **Ghose** | Yes | Yes | Yes | Yes |
| **Veber** | Yes | Yes | Yes | Yes |
| **Egan** | Yes | Yes | Yes | Yes |
| **Muegge** | Yes | Yes | Yes | Yes |
| **Medicinal Chemistry** | **PAINS** | 0 | 0 | 1 | 0 |
| **Brenk** | 1 | 0 | 1 | 0 |
| **Lead likeness** | No | Yes | Yes | Yes |
| **Synthetic accessibility** | 2.02 | 2.96 | 3.11 | 3.01 |


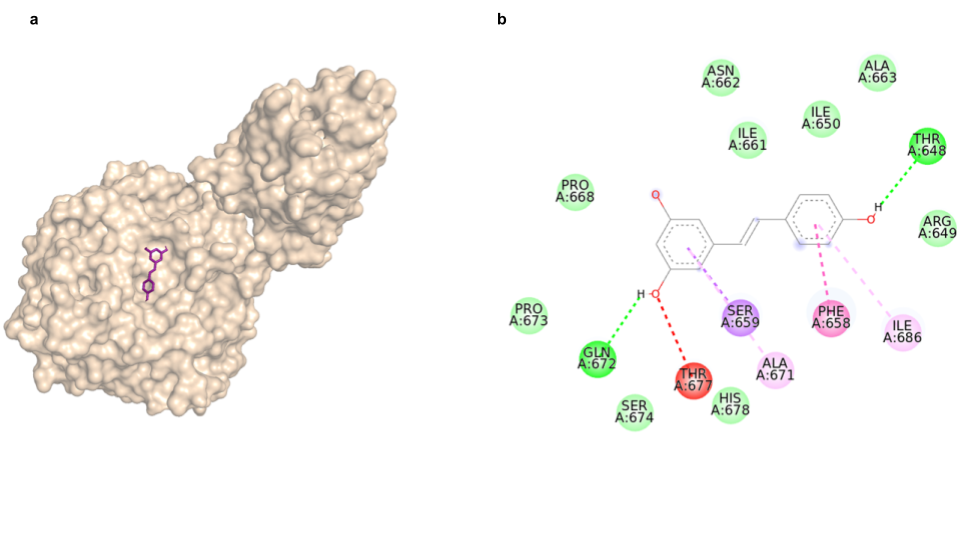


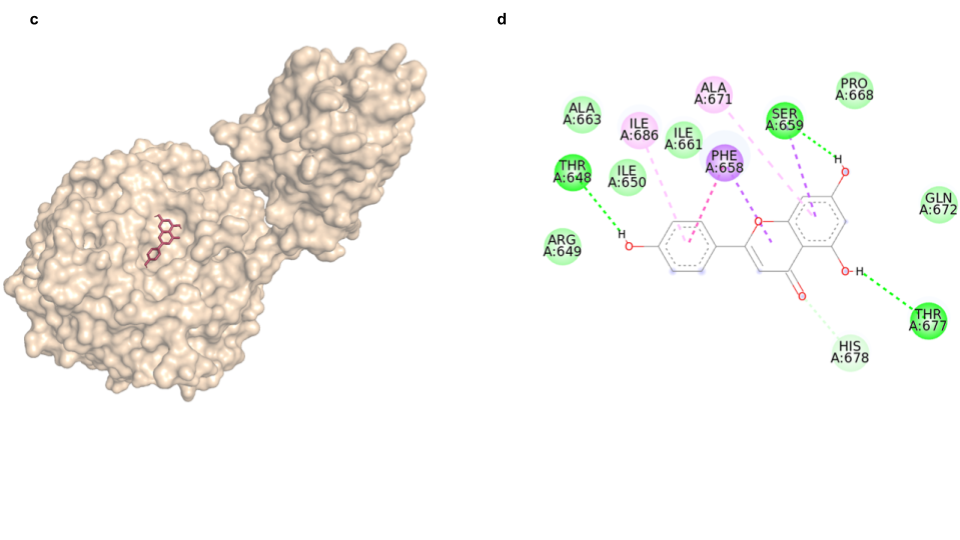


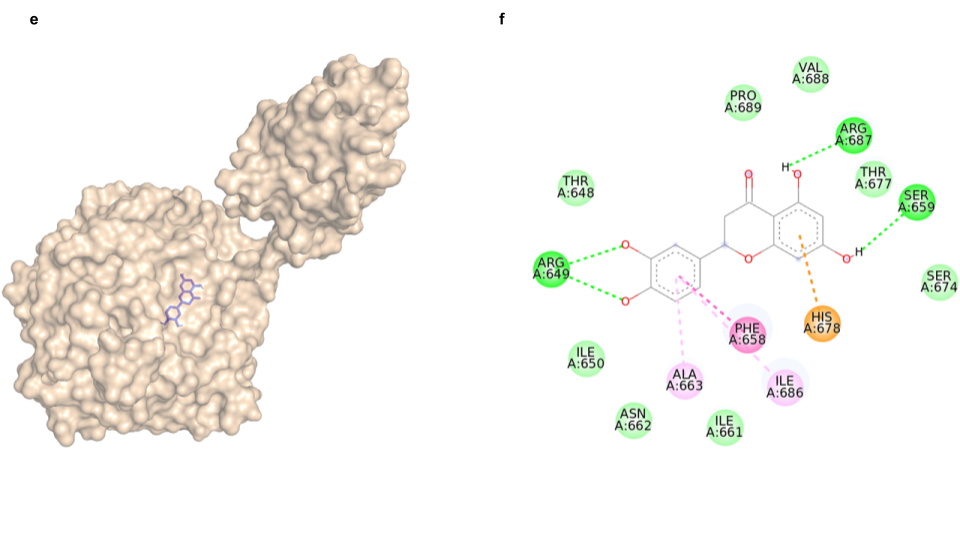


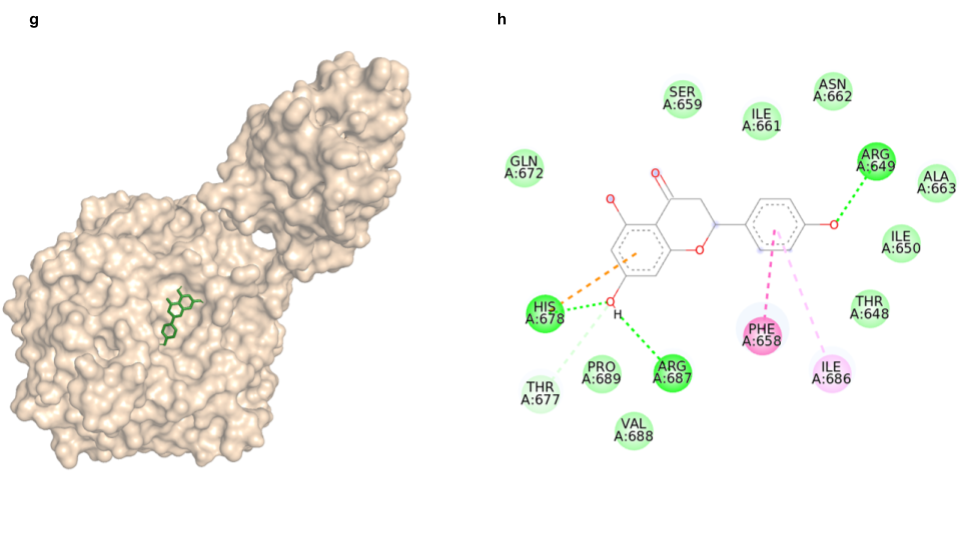


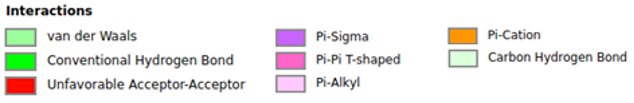


**Online Resource 4** Binding of the ligands with Bap1: (a) 3D illustration of resveratrol in the binding site of Bap1, (b) 2D illustration of the interactions between resveratrol and Bap1, (c-d) Apigenin, (e-f) Eriodictyol and (g-h) Naringenin


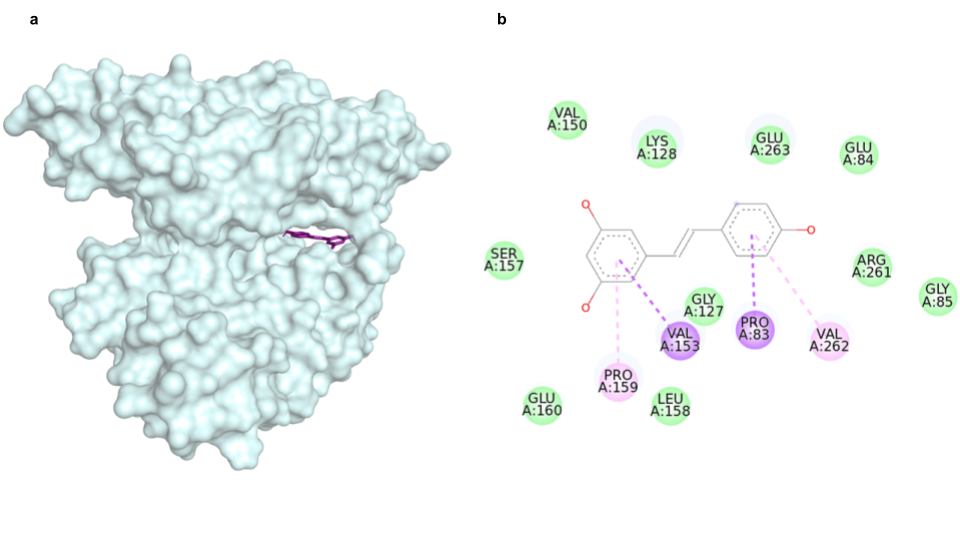


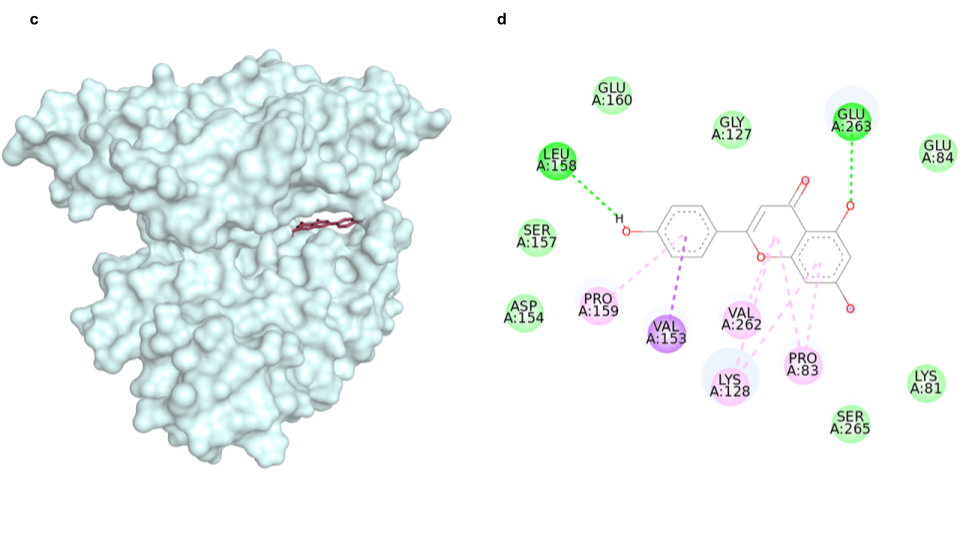


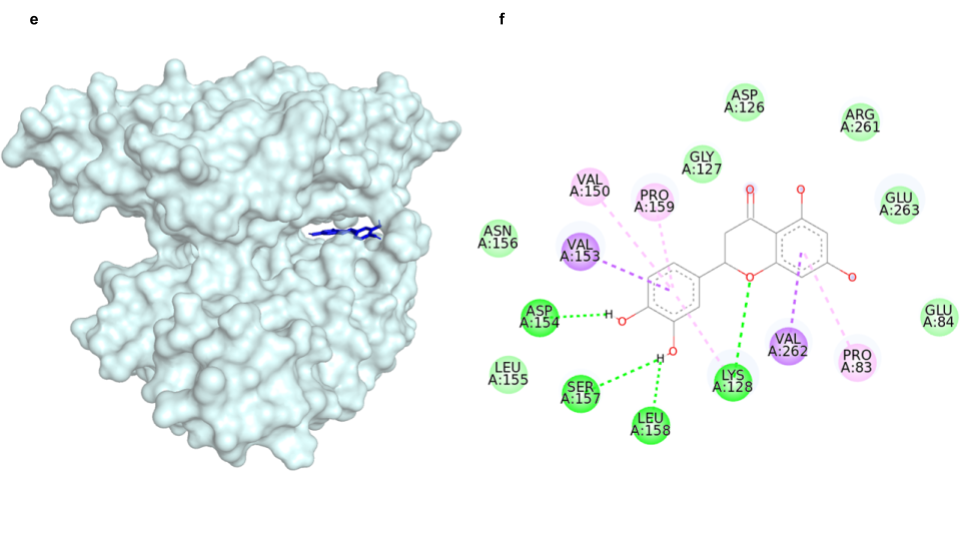


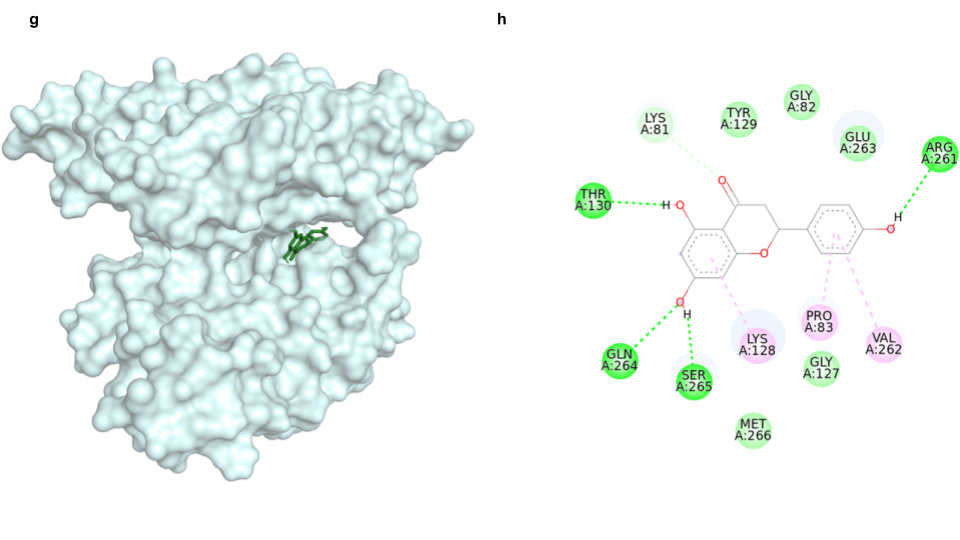


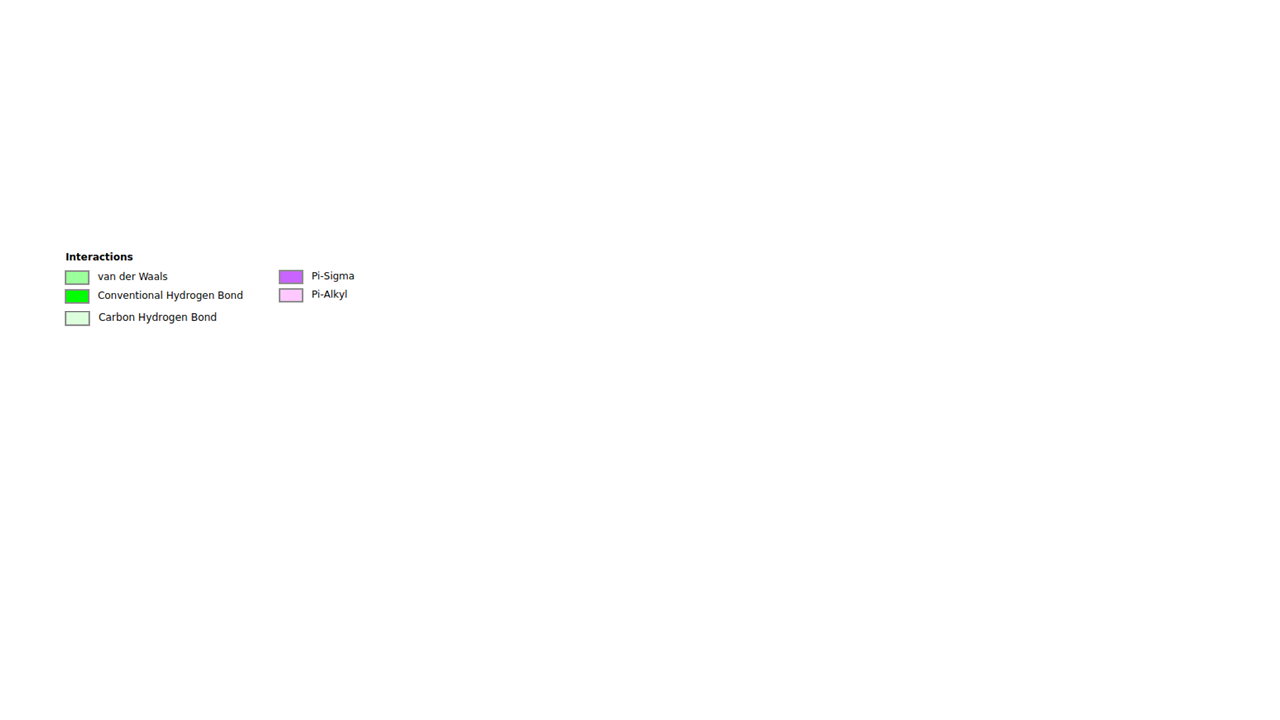


**Online Resource 5** Binding of the ligands with RbmA: (a) 3D illustration of resveratrol in the binding site of RbmA, (b) 2D illustration of the interactions between resveratrol and RbmA, (c-d) Apigenin, (e-f) Eriodictyol and (g-h) Naringenin


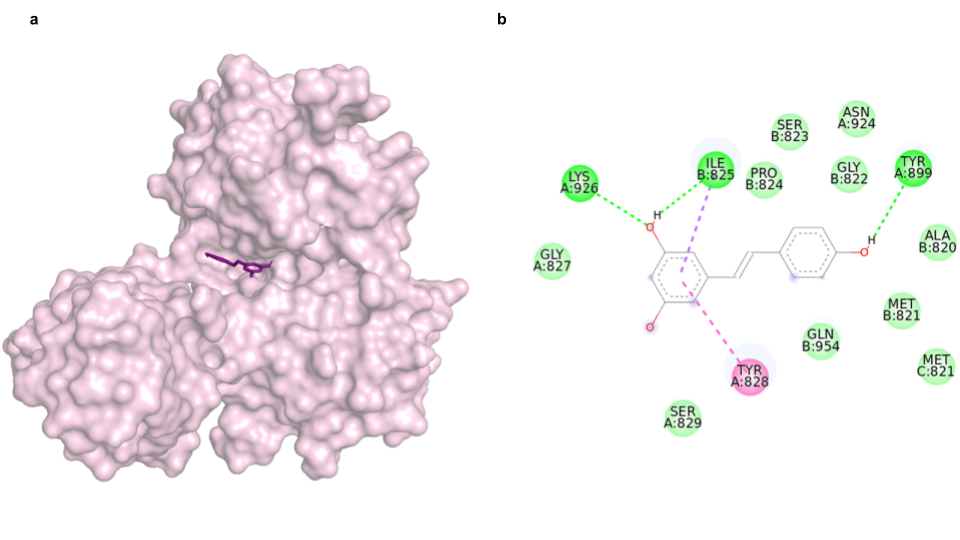


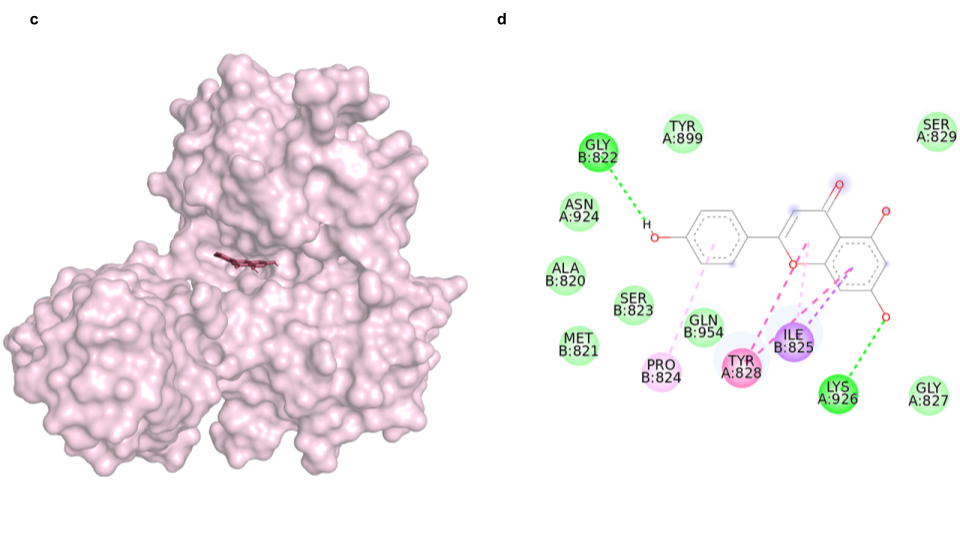


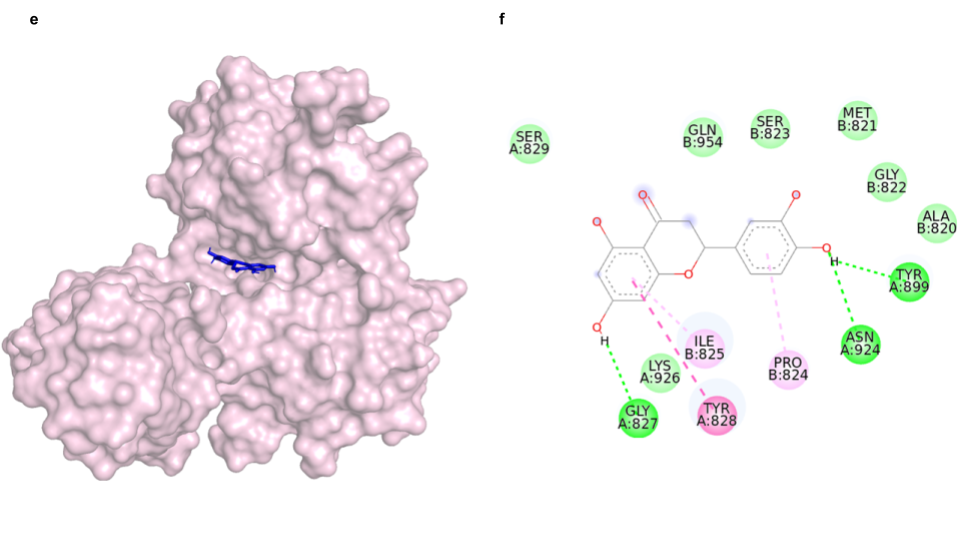


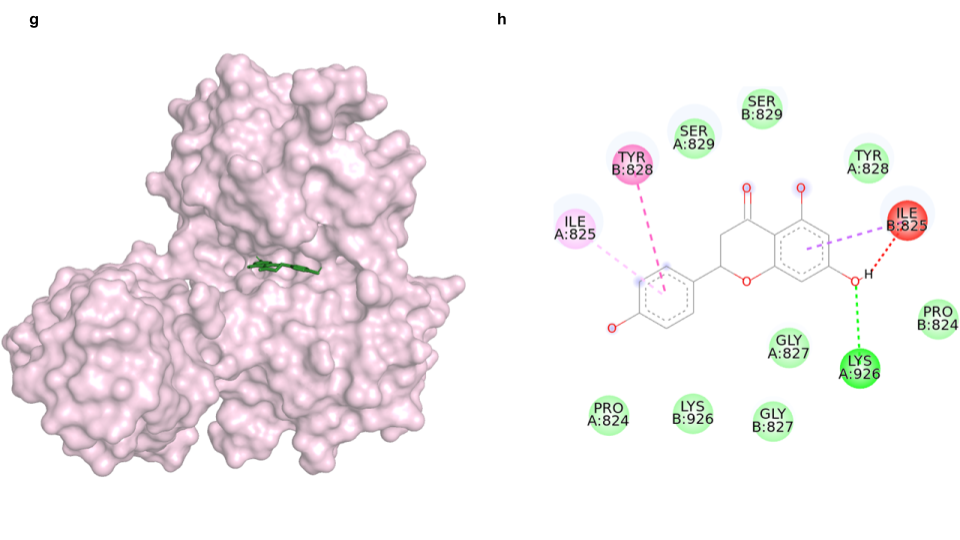


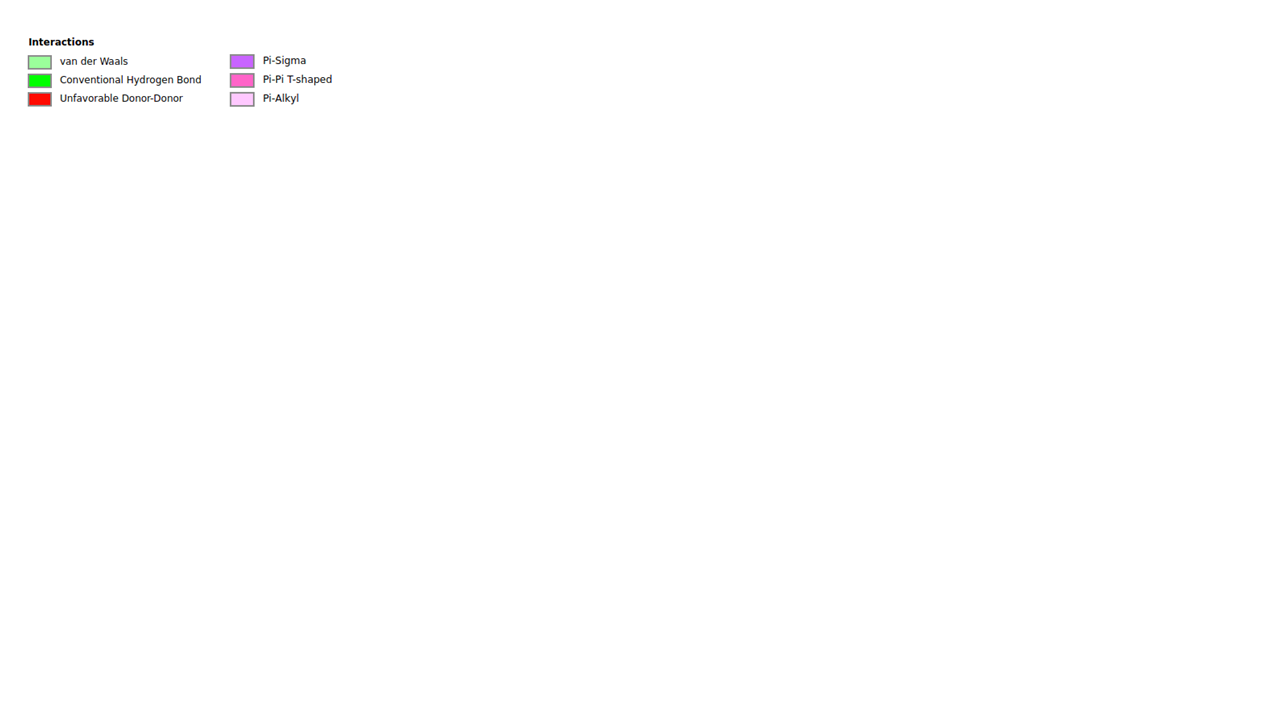


**Online Resource 6** Binding of the ligands with RbmC: (a) 3D illustration of resveratrol in the binding site of RbmC, (b) 2D illustration of the interactions between resveratrol and RbmC, (c-d) Apigenin, (e-f) Eriodictyol and (g-h) Naringenin
